# Supplementary material for: Social Return on Investment (SROI) methodology to account for value for money of public health interventions: a systematic review
Source: BMC Public Health. 2015 Jun 24;15:582. doi: 10.1186/s12889-015-1935-7 (PMC4477315; doi:10.1186/s12889-015-1935-7)
Supplement: Additional file 2: — Quality assessment of public health SROI studies. [file 12889_2015_1935_MOESM2_ESM.xlsx]

## Sheet: Additionalt_file_1
Quality Dimension	S/No.	Quality Dimension\ Author-Date	Somers AB, 2005	Forth Sector Development, 2007	Varua, ME & Stenberg LC, 2009	Goodspeed T, 2009	Murphy R, 2010	Lukoseviciute L, 2010	International HIV/AIDS Alliance, 2010	Bradly J, 2010	COUI UK, 2010	Jönsson J et al, 2011	Brady R, 2011	Kennedy R & Phillips J, 2011	Pank H, 2011	Glasgow Association of Mental Health, 2011	RM Insight, 2011	Shipley R & Hamilton L, 2011	Carrick K & Lindhof J, 2011	WRVS & Frontier Economics ltd, 2011	Brady R, 2011b	Whizz Kidz & Frontier Economics ltd, 2011	Misje T, 2011	Cawley J & Berzins K, 2011	Tong L et al, 2012	Jones M, 2012	Lobley N et al, 2012	Satchwell Smith P, 2012	Bagley A, 2012	McCorriston E, 2012	Age Concern Kingston upon Thames, 2012	Bhuamik U et al, 2013	Paths for All, 2013	Whelan G, 2013	Bradly J & Leicestershire County Council, 2013	Bradly J et al, 2013	Bradly J & Bolas C, 2013	SVA Consulting, 2013	Eckley L, 2013	nef Consulting & Christian Aid, 2013	Action on Addiction, 2014	Arvidson M et al, 2014	Number of articles with criteria	% of articles with criteria
Transparency about why SROI was chosen	1	Linked to context discussion?	1	1	1	1	1	1	1	1	1	1	1	1	1	1	1	1	1	1	1	1	1	1	1	1	1	1	1	1	1	1	1	1	1	1	1	1	1	1	1	1	40	100
Documentation of the analysis	2	Analysis well documented?	1	1	1	1	1	1	1	1	1	1	1	1	1	0	1	1	1	1	0	0	1	0	0	1	1	1	1	1	0	1	1	1	1	1	1	1	1	1	1	1	34	85
	3	Impact map used?	1	1	1	1	1	0	1	1	1	1	1	1	1	1	1	1	1	1	1	0	0	0	0	1	1	1	1	1	0	0	1	1	1	1	1	1	1	1	1	1	33	82.5
Study design (approximation of 'dead-weight')	4	Control group setup applied?	0	0	0	0	0	1	0	0	0	1	1	0	0	0	0	0	0	0	0	0	0	0	0	1	0	0	0	0	0	1	0	1	0	0	1	0	0	1	0	0	8	20
	5	Ex ante - ex post observations performed?	0	0	0	0	1	0	1	0	0	0	0	0	0	1	1	0	1	0	1	1	0	0	0	0	0	0	0	0	0	0	1	0	0	0	0	0	0	0	0	0	8	20
Precision of the analysis	6	Indicators valid & comprehensive?	1	1	1	1	1	1	1	1	1	1	1	1	1	1	1	1	1	1	1	1	1	0	0	1	1	1	1	1	0	1	1	1	1	1	1	1	1	1	1	1	37	92.5
	7	Proxies valid & comprehensive?	1	1	0	1	1	1	1	1	1	1	1	1	1	1	1	1	1	1	0	1	0	0	0	1	1	1	1	1	0	1	1	1	1	1	1	1	1	1	1	1	34	85
	8	Social effects captured? (qualitatively)	1	1	0	1	1	0	1	1	1	1	1	1	0	1	1	1	1	1	0	1	1	1	1	1	1	1	1	1	1	0	1	1	1	1	1	1	1	1	1	1	35	87.5
	9	Social effects captured? (quantitatively)	1	1	1	1	1	1	1	1	1	1	1	1	1	0	1	1	1	1	1	1	1	1	0	1	1	1	1	1	1	1	1	1	0	1	1	1	1	1	1	1	37	92.5
Reflection of the results	10	Limitations discussed?	0	1	0	1	1	0	1	0	0	1	1	1	0	0	0	0	0	1	1	0	1	0	0	1	0	1	1	0	0	1	0	1	0	0	1	0	1	1	0	1	19	47.5
	11	SROI ratio interpreted?	1	1	1	1	1	1	1	1	1	1	1	1	1	1	1	1	1	1	1	1	1	1	1	1	1	1	1	1	1	1	1	1	1	1	1	1	1	1	1	1	40	100
	12	Sensitivity analysis performed?	1	1	1	1	0	1	1	1	1	0	1	1	1	1	1	1	1	1	0	1	1	0	0	1	1	1	1	1	0	0	1	1	1	1	1	1	1	1	1	0	32	80
		Quality Score	9	10	7	10	10	8	11	9	9	10	11	10	8	8	10	9	10	10	7	8	8	4	3	11	9	10	10	9	4	8	10	11	8	9	11	9	10	11	9	9
